# Supplementary material
Source: PubMed Central journal article supplement (PMC3994869)
Supplement: amiajnl-2013-002233-s1.pdf [file amiajnl-2013-002233-s1.pdf]

## **Appendix A. Clinical Case Scenario Standardized Script**

### Case Information Provided to Resident (via electronic triage module of Emergency Department Electronic Health Record)

Chief Complaint: Headache

55 year old male with headache after hit in head with softball

Vitals: Heart Rate 77, Blood Pressure 134/78, Respiratory Rate 14

---

### Patient History Script for Patient Role Player

Chief Complaint: My head hurts

Demographics: 55-year-old male

History of Present Illness: I was playing softball and got hit in the left side of the head with a fastball pitch. I was able to run to first base, but have since been feeling dizzy and have a headache. I vomited twice. No vision change. No motor or sensory symptoms. Walking normally. I was not wearing a helmet. I did not fall and have no pain in any other body part.

My head 'aches' on the left side where the pitch hit me. No radiation of pain. Severity 5/10. No medications tried. No neck pain.

Past Medical History: Hypertension  
Atrial Fibrillation

Past Surgical History: none

Medications: Aspirin 81 mg by mouth daily

Hydrochlorothiazide 25 mg by mouth daily

Coumadin 5 mg by mouth nightly (last International Normalized Ratio checked last week was 2.4)

Allergies: Morphine → hives

Social History: Family: married with 2 kids

Work: Investment banker

Hobbies: Playing on work softball team

No smoking; occasional alcohol use, no drugs

*Note: Participant questions that are not specifically addressed in this script, will be answered with "I don't know"*

---

Physical Exam:

Vital signs: Temperature 98.7 F, Heart Rate 77, Blood Pressure 134/78, Respiratory Rate 14,  
Oxygen saturation 99% on room air

General: alert, oriented, no distress, comfortable

Head: patient wearing baseball cap – if removed, hematoma over left  
temporal scalp (no laceration)

No battle signs

Eyes, Ears, Nose, Throat: normal, pupils normal

Neck: no midline tenderness to palpation, no step-offs

Full range of motion

Chest: no signs of external trauma

Irregularly, irregular; s1 and s2 heart sounds present, no murmurs, rubs or gallops

[Note: If resident auscultates heart or checks pulses, informed heart is irregular]

Lungs: clear to auscultation bilaterally

Abdomen: soft, non-tender

Extremity: full range of motion in all 4 extremities

No lower extremity edema

Neurological:

Mental Status: awake, alert, and oriented to person, place and time

Cranial Nerves: II-XII grossly intact

Strength: 5/5 throughout

Sensation: gross touch intact

Cerebellar: finger to nose and rapid alternating movements normal

Reflexes: normal

Gait: normal

---

### Laboratory and Imaging Results

1. Complete blood count and Coagulation factors → international normalized ratio (INR) 2.5
2. Type and Screen, Chemistry panel → within normal limits
3. Head Computed Tomography (CT) (headache, anticoagulant use, blunt trauma) → no bleed, mass, shift
4. No facial or cervical-spine CT needed -- clearance by National Emergency X-Radiography Utilization Study (NEXUS)<sup>33</sup> or Canadian cervical-spine rule<sup>34</sup>
5. Other tests ordered by resident will return within normal limits

[INTERRUPTION – When the participant *first begins typing text into the assessment and plan section of the provider documentation*, the participant will be asked by a nurse/technician to

review an electrocardiogram (ECG) for another patient (explaining that the nurse/technician could not find the attending physician to review the ECG). Participant given normal ECG to review]
